# Supplementary material for: A Biomass Based Photonic Crystal Hydrogel Made of Bletilla striata Polysaccharide
Source: MDPI journal article supplement (doi:10.3390/bios12100841), 2022-10-08
Supplement: s1 [file s1]

Supporting information

# A Biomass Based Photonic Crystal Hydrogel Made of *Bletilla striata* Polysaccharide

Bo Sun, Wenxin Zhang, Yangyang Liu, Min Xue, Lili Qiu \* and Zihui Meng \*

School of Chemistry and Chemical Engineering, Beijing Institute of Technology, Beijing 100081, China

\* Correspondence: qiulili@bit.edu.cn (L.Q.); mengzh@bit.edu.cn (Z.M.)

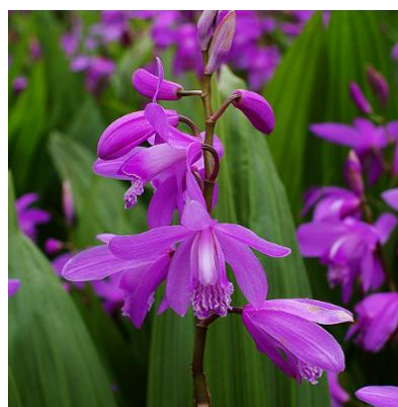

Figure S1. A photo of the *Bletilla striata*.

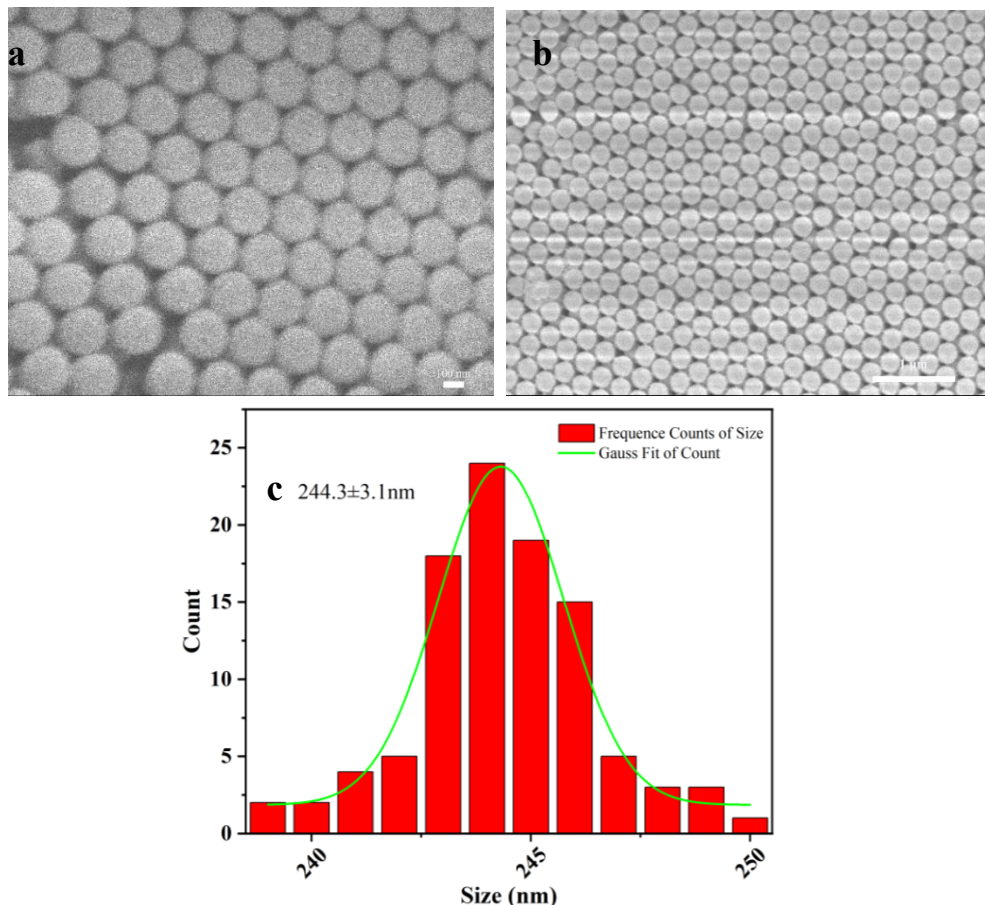

Figure S2. SEM images of PMMA nanospheres (a), 3D photonic crystals (b), and particle size distribution of PMMA nanospheres(c).

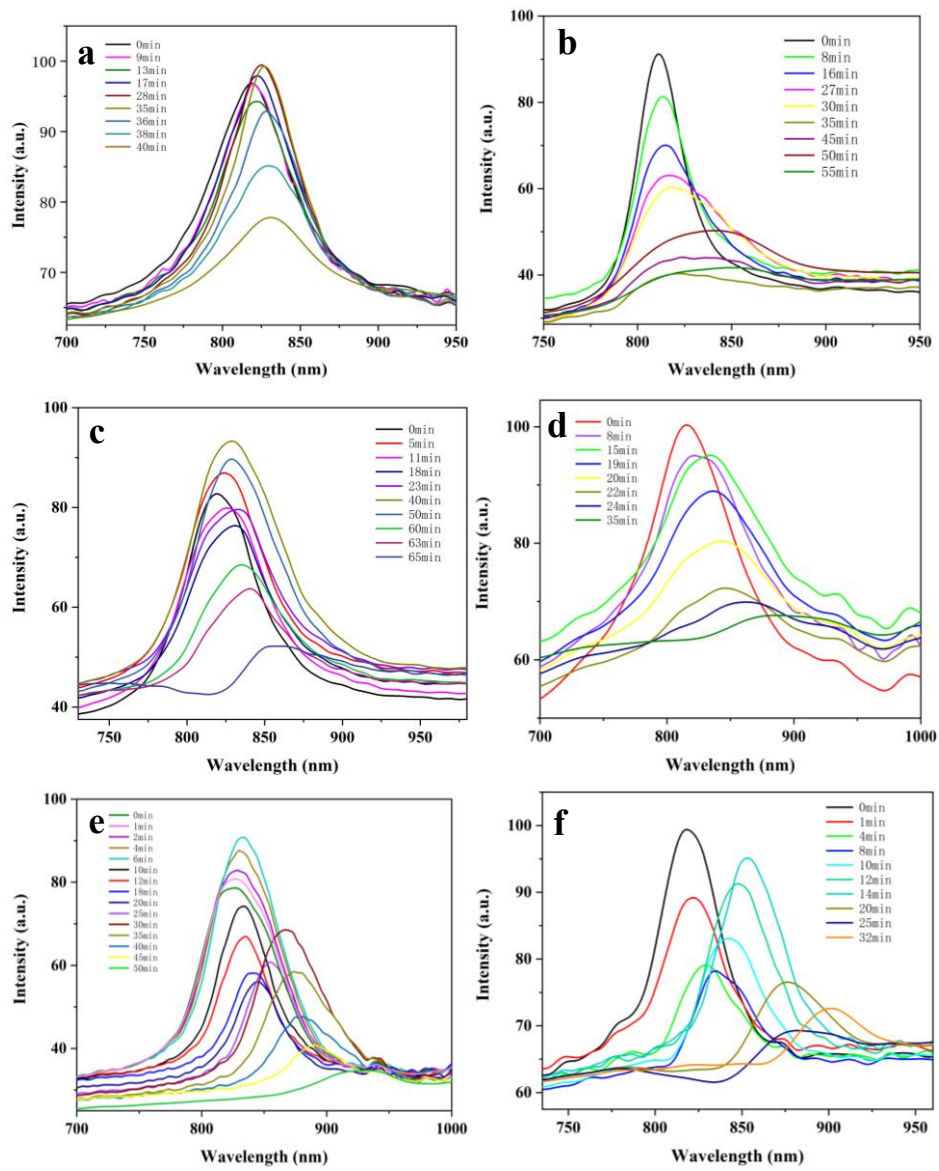

**Figure S3.** Response of PhCs hydrogels with different BSP contents(5% (a), 8% (b), 10% (c), 12% (d), 15% (e), 20% (f)) to 30%  $H_2O_2$ .

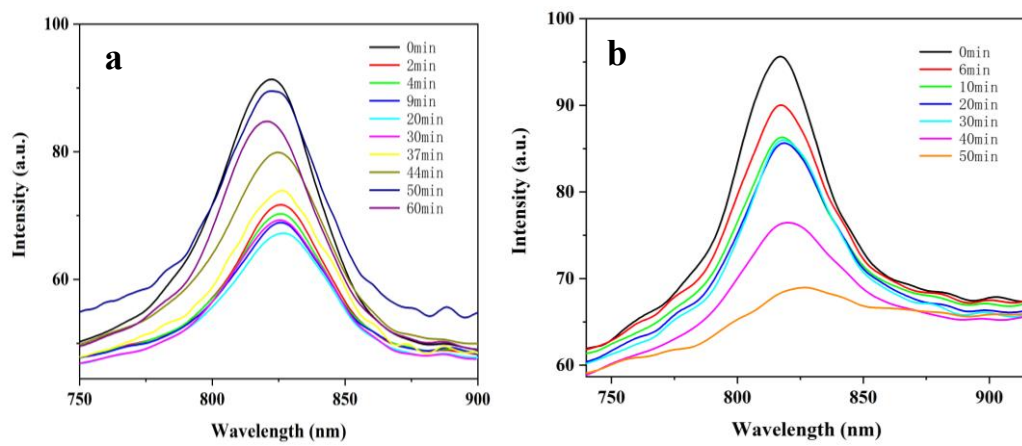

**Figure S4.** Control group (a) response of PhCs hydrogels with 15% BSP content to  $H_2O$ . (b) response of PhCs hydrogels with 0% BSP content to  $H_2O_2$ .

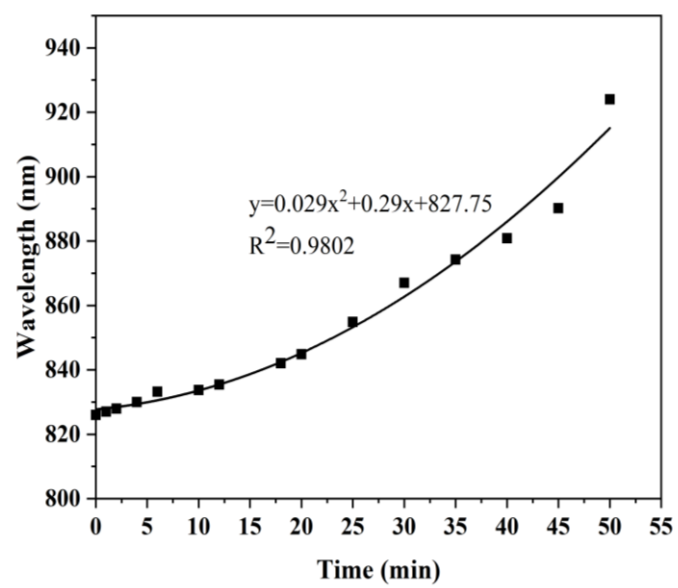

**Figure S5.** Reflection wavelength-time relationship of PhCs hydrogels with 15% BSP content.
